# Supplementary material for: The importance of inversion disorder in the visible light induced persistent luminescence in Cr3+doped AB2O4(A = Zn or Mg and B = Ga or Al)
Source: Royal Society of Chemistry journal article supplement (doi:10.1039/c4cp03866e), 2014-11-24
Supplement: c4cp03866e1.pdf [file c4cp03866e1.pdf]

Supplementary for the paper titled  
**“Importance of inversion disorder in  
visible light induced persistent  
luminescence in Cr<sup>3+</sup> doped AB<sub>2</sub>O<sub>4</sub> ”**

## 1 EPR spectra

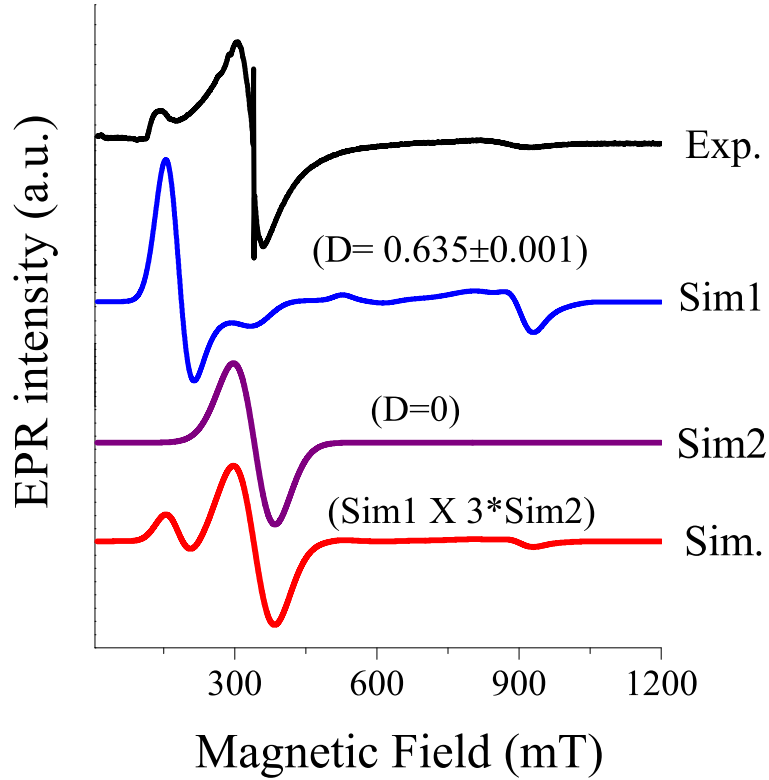

Figure 1: Details of the simulation of the X-band EPR spectrum of  $\text{Cr}^{3+}$  in MGO. The simulated spectrum (Sim) is the weighted sum of isolated  $\text{Cr}^{3+}$  ions (Sim1) and clusters of antiferromagnetically coupled  $\text{Cr}^{3+}$  ions (Sim2). Sim1 considers  $\text{Cr}^{3+}$  in octahedral sites with trigonal distortion, submitted to strong strain broadening induced by the high level of antisite disorder.

## 2 XRD and Rietveld refinement

The reference compound  $\text{ZnCr}_2\text{O}_4$  (ZCO) compound (compared for EXAFS pattern in Figure 6 of main paper) was prepared by solid state method by mixing thoroughly the constituents,  $\text{ZnO}$  and  $\text{CrO}_3$ , in cation stoichiometric ratio and annealed at  $1300^\circ\text{C}$ . The sample was characterized by X-ray diffraction using  $\text{Cu-K}\alpha$  radiation in the angular range of  $20^\circ$  to  $80^\circ$ . The diffraction patterns of all compounds were Rietveld refined using FullProf

Table 1: Simulation parameters of powder EPR spectra of Cr-doped ZGO, ZAO and MGO samples.

| Sample | $g_x = g_y$ | $g_z$   | D ( $\text{cm}^{-1}$ ) |
|--------|-------------|---------|------------------------|
| d-ZGO  | 1.976       | 1.977   | $0.525 \pm 0.002$      |
| d-ZAO  | 1.98(2)     | 1.97(2) | $0.932 \pm 0.001$      |
| d-MGO  | 1.99(5)     | 1.95(5) | $0.635 \pm 0.001$      |

suite and the data along with calculated patterns and residues are presented in Figure 2. The parameters obtained after refinement are given in Table 2.

### 3 EXAFS measurements

The parameters obtained from Cr K edge EXAFS fitting of the  $\text{Cr}^{3+}$  doped ZGO compounds, d-MGO, d-ZAO and ZCO in the k range 3 to  $10 \text{ \AA}^{-1}$  are shown in the Table 3 below.

Zn K edge and Ga K edge EXAFS patterns were fit for d-ZGO, s-ZGO and e-ZGO compounds. The experimental curves along with the fits for one of the compounds d-ZGO are shown in the Figure 3, and the parameters obtained by fitting are tabulated in Table 4.

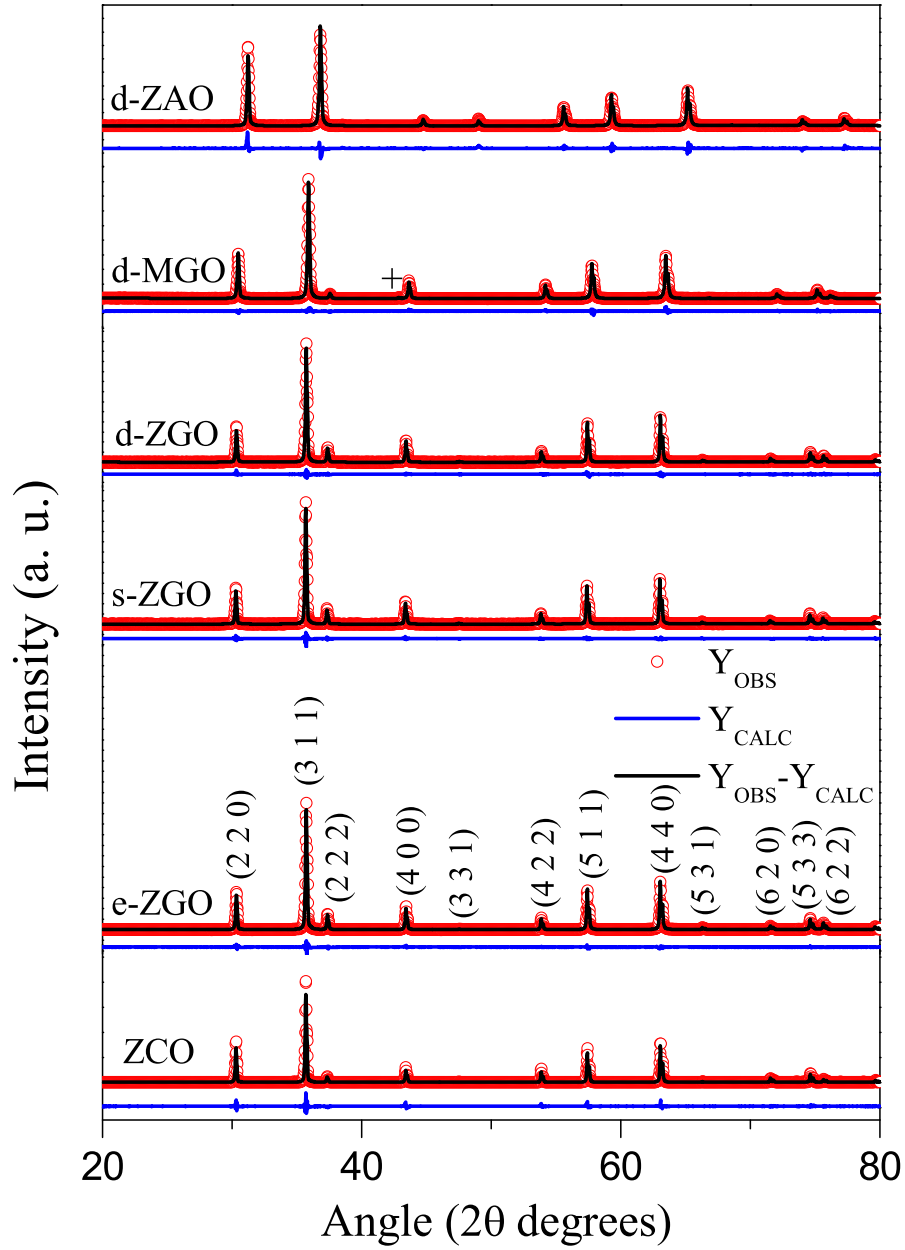

Figure 2: Rietveld refined XRD patterns along with residual patterns (blue lines) for the  $Cr^{3+}$  doped ZGO, MGO and ZAO compounds, and for ZCO compound (bottom). The peaks are indexed for e-ZGO compound (JCPDS 38-1240).

Table 2: Parameters obtained from Rietveld refinement of XRD patterns.

| Parameters        | e-ZGO            | s-ZGO            | d-ZGO            | d-MGO                                      | d-ZAO            | ZCO             |
|-------------------|------------------|------------------|------------------|--------------------------------------------|------------------|-----------------|
| $a$ (Å)           | 8.33631(4)       | 8.33592(4)       | 8.33291(3)       | 8.28012(5)                                 | 8.09372(6)       | 8.33075(6)      |
| A site occupancy  | 0.04207#<br>(Zn) | 0.04166#<br>(Zn) | 0.04125#<br>(Zn) | 0.00423(14)<br>(Mg)<br>0.03702(14)<br>(Ga) | 0.04125*<br>(Zn) | 0.04166<br>(Zn) |
| B site occupancy  | 0.08291#<br>(Ga) | 0.08291#<br>(Ga) | 0.08291#<br>(Ga) | 0.04589(14)<br>(Ga)                        | 0.08291*<br>(Al) | 0.08333<br>(Cr) |
|                   | 0.00042<br>(Cr)  | 0.00042<br>(Cr)  | 0.00042<br>(Cr)  | 0.03702(14)<br>(Mg)<br>0.00042<br>(Cr)     | 0.00042<br>(Cr)  |                 |
| $\chi^2$ (Global) | 2.11             | 1.97             | 1.86             | 1.74                                       | 3.83             | 2.17            |
| $R_{Bragg}$       | 2.25             | 2.01             | 2.74             | 3.06                                       | 7.11             | 5.78            |
| $R_p$             | 9.24             | 8.83             | 8.76             | 9.82                                       | 16.5             | 18.8            |
| $R_{wp}$          | 13.6             | 13.3             | 12.7             | 13.8                                       | 19.8             | 25.4            |
| $R_e$             | 9.65             | 9.71             | 9.61             | 10.8                                       | 10.3             | 17.8            |

# unrefined occupancies

\* d-ZAO pattern was fitted with only normal spinel structure model since an attempt to fit also the inverse spinel model yielded unphysical occupancies.

Table 3: Parameters obtained from fitting Cr K edge EXAFS data in  $AB_2O_4:Cr^{3+}$  (A = Zn or Mg, B = Ga or Al) compounds.

| Samples            | Cr-O      |                              |                         | Cr-Ga     |                              | Cr-Zn     |                              |
|--------------------|-----------|------------------------------|-------------------------|-----------|------------------------------|-----------|------------------------------|
|                    | R (Å)     | $\sigma^2$ (Å <sup>2</sup> ) | $C_3$ (Å <sup>3</sup> ) | R (Å)     | $\sigma^2$ (Å <sup>2</sup> ) | R (Å)     | $\sigma^2$ (Å <sup>2</sup> ) |
| e-ZGO              | 1.94 (2)  | 0.0014 (6)                   | 0.0004 (2)              | 2.95 (2)  | 0.005 (1)                    | 3.42 (5)  | 0.009 (4)                    |
| s-ZGO              | 1.95 (1)  | 0.0014 (5)                   | 0.0010 (2)              | 2.95 (1)  | 0.004 (1)                    | 3.41 (4)  | 0.010 (4)                    |
| d-ZGO              | 1.96 (2)  | 0.0001 (12)                  | 0.0011 (4)              | 2.95 (3)  | 0.004 (2)                    | 3.42 (5)  | 0.004 (3)                    |
| d-MGO <sup>1</sup> | 2.056 (2) | 0.005 (5)                    |                         | 2.93 (1)  | 0.007 (3)                    | 3.41 (2)  | 0.005 (4)                    |
| d-MGO <sup>2</sup> | 1.90 (2)  | 0.005 (5)                    |                         | 2.90 (2)  | 0.005 (3)                    | 3.44 (1)  | 0.007 (3)                    |
| d-ZAO              | 1.992 (4) | 0.0026 (7)                   |                         | 2.882 (7) | 0.0003 (15)                  | 3.350 (6) | 0.0029 (9)                   |
| ZCO                | 1.98 (1)  | 0.0045 (6)                   |                         | 2.95 (1)* | 0.0054 (5)*                  | 3.46 (1)  | 0.010 (2)                    |

d-MGO<sup>1</sup> refers to normal spinel MGO model and d-MGO<sup>2</sup> refers to inverse spinel MGO model. \*Cr-Cr bond length and  $\sigma^2$  in case of ZCO.

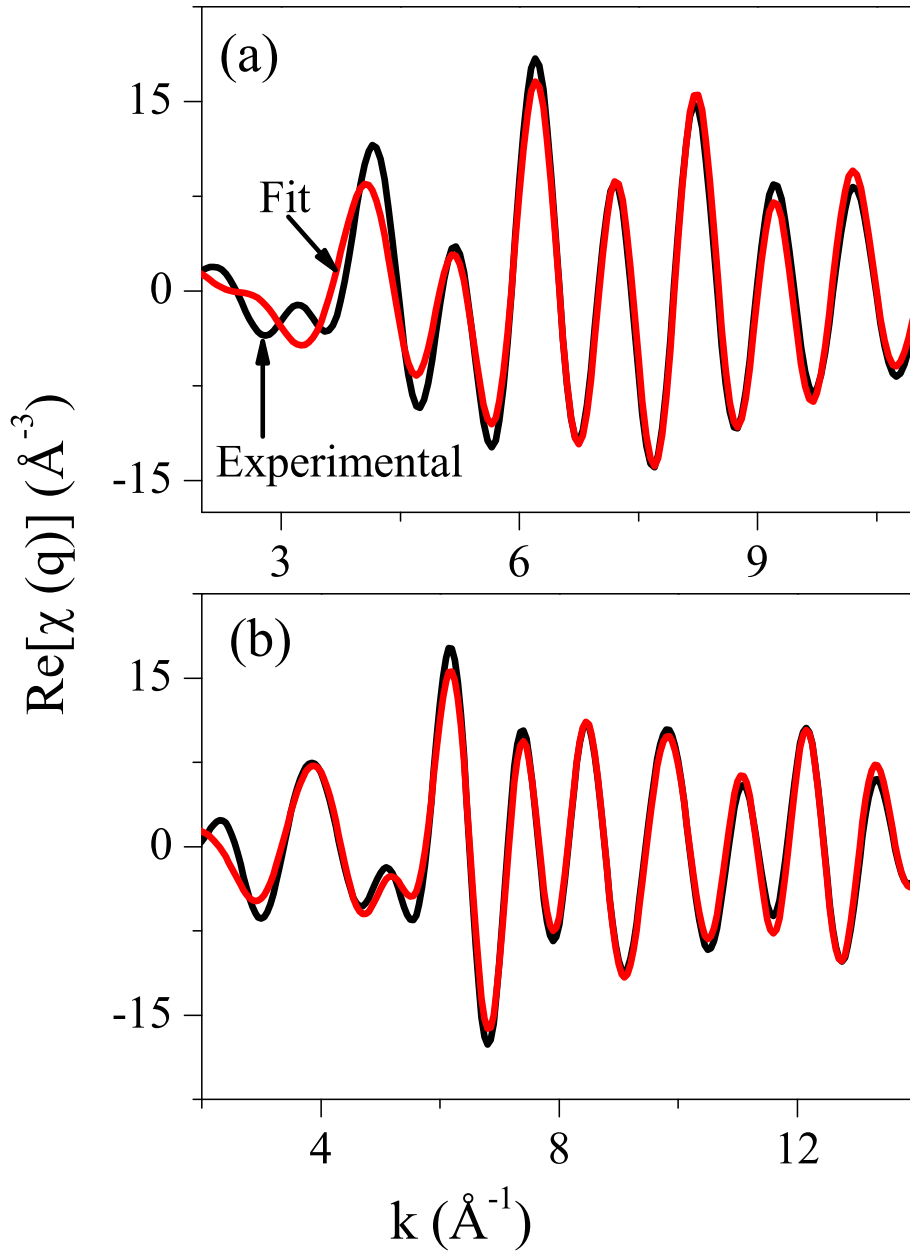

Figure 3: FT magnitude of EXAFS pattern: (a) Zn K edge experimental spectrum along with fit in back transformed  $k$  space in  $k$  range 2 to 11  $\text{\AA}^{-1}$ , (b) Ga K edge experimental spectrum along with fit in the  $k$  range 2 to 14  $\text{\AA}^{-1}$  in back transformed  $k$  space for d-ZGO compound.

Table 4: Parameters obtained by Zn K edge and Ga K edge EXAFS fitting for the Cr<sup>3+</sup> doped d-MGO and d-ZAO compounds.

| Zn K edge fitting |           |                              |           |                              |           |                              |
|-------------------|-----------|------------------------------|-----------|------------------------------|-----------|------------------------------|
| Samples           | Zn-O      |                              | Zn-Ga     |                              | Zn-Zn     |                              |
|                   | R (Å)     | $\sigma^2$ (Å <sup>2</sup> ) | R (Å)     | $\sigma^2$ (Å <sup>2</sup> ) | R (Å)     | $\sigma^2$ (Å <sup>2</sup> ) |
| d-ZGO             | 1.96 (2)  | 0.005 (5)                    | 3.452(5)  | 0.0072 (5)                   | 3.572 (6) | 0.0027 (9)                   |
| s-ZGO             | 1.97 (2)  | 0.005 (3)                    | 3.459 (4) | 0.0069 (3)                   | 3.586 (5) | 0.0034 (7)                   |
| e-ZGO             | 1.97 (2)  | 0.005 (3)                    | 3.465 (4) | 0.0069 (3)                   | 3.591 (5) | 0.0038 (7)                   |
| Ga K edge fitting |           |                              |           |                              |           |                              |
| Samples           | Ga-O      |                              | Ga-Ga     |                              | Ga-Zn     |                              |
|                   | R (Å)     | $\sigma^2$ (Å <sup>2</sup> ) | R (Å)     | $\sigma^2$ (Å <sup>2</sup> ) | R (Å)     | $\sigma^2$ (Å <sup>2</sup> ) |
| d-ZGO             | 1.981 (8) | 0.005 (1)                    | 2.964 (8) | 0.0043 (2)                   | 3.45 (2)  | 0.007 (1)                    |
| s-ZGO             | 1.97 (1)  | 0.0055 (7)                   | 2.963 (9) | 0.0048 (2)                   | 3.458 (9) | 0.007 (1)                    |
| e-ZGO             | 1.97 (1)  | 0.0061 (7)                   | 2.957 (7) | 0.0049 (2)                   | 3.464 (8) | 0.007 (1)                    |
